# Supplementary material for: Tough, ultrastretchable and tear-resistant hydrogels enabled by linear macro-cross-linker
Source: Royal Society of Chemistry journal article supplement (doi:10.1039/c9py00600a), 2019-01-01
Supplement: c9py00600a1.pdf [file c9py00600a1.pdf]

# Tough, ultrastretchable and tear-resistant hydrogels enabled by linear macro-crosslinker

Zhenxing Cao,<sup>‡a</sup> Yi Wang,<sup>‡a</sup> Hao Wang,<sup>a</sup> Changshu Ma,<sup>a</sup> Heng Li,<sup>a</sup> Jing Zheng,<sup>a</sup>

Jinrong Wu<sup>\*a</sup> and Guangsu Huang<sup>\*a</sup>

<sup>a</sup>State Key Laboratory of Polymer Materials Engineering, College of Polymer Science and Engineering, Sichuan University, Chengdu 610065, P. R. China

<sup>‡</sup> These authors contributed equally to this paper.

## Corresponding author contact:

Prof. Jinrong Wu; Prof. Guangsu Huang

College of Polymer Science and Engineering

Sichuan University

Chengdu 610065, China

Email: [wujinrong@scu.edu.cn](mailto:wujinrong@scu.edu.cn); [guangsu-huang@hotmail.com](mailto:guangsu-huang@hotmail.com);

Phone: 86-28-85463433

Fax: 86-28-85463433

## Supporting Tables & Figures

Table S1. Different yield values of CA macro-crosslinker.

|                     |               |
|---------------------|---------------|
| <b>Yield of CA</b>  | <b>20.32%</b> |
| <b>Yield of AGE</b> | <b>13.99%</b> |

Table S2. The swelling properties of the MC hydrogels and the calculation of crosslinking density.

| <b>Sample</b>        | <b>Hydrogel<br/>Weight<br/>(g)</b> | <b>Polymer<br/>Weight<br/>(g)</b> | <b>Swollen<br/>weight<br/>(g)</b> | <b>Swelling<br/>ratio<br/>(Q)</b> | <b>Crosslinking<br/>density<br/>(mol•m<sup>-3</sup>)</b> |
|----------------------|------------------------------------|-----------------------------------|-----------------------------------|-----------------------------------|----------------------------------------------------------|
| MC <sub>0.5-30</sub> | 1.81                               | 0.44                              | 62.46                             | 139.97                            | 0.48                                                     |
| MC <sub>1.0-30</sub> | 2.28                               | 0.56                              | 53.31                             | 94.35                             | 0.93                                                     |
| MC <sub>2.0-30</sub> | 1.84                               | 0.45                              | 23.70                             | 51.67                             | 2.63                                                     |
| MC <sub>3.0-30</sub> | 1.83                               | 0.45                              | 20.69                             | 45.18                             | 3.32                                                     |

Table S3. The swelling properties of the H-MC, M-MC and L-MC.

| <b>Sample</b> | <b>Hydrogel<br/>Weight<br/>(g)</b> | <b>Polymer<br/>Weight<br/>(g)</b> | <b>Swollen<br/>weight<br/>(g)</b> | <b>Swelling<br/>ratio<br/>(Q)</b> | <b>Crosslinkin<br/>g<br/>density<br/>(mol•m<sup>-3</sup>)</b> |
|---------------|------------------------------------|-----------------------------------|-----------------------------------|-----------------------------------|---------------------------------------------------------------|
| H-MC          | 2.11                               | 0.53                              | 67.98                             | 128.14                            | 0.57                                                          |
| M-MC          | 1.95                               | 0.49                              | 61.12                             | 124.53                            | 0.58                                                          |
| L-MC          | 2.13                               | 0.53                              | 67.50                             | 125.48                            | 0.58                                                          |

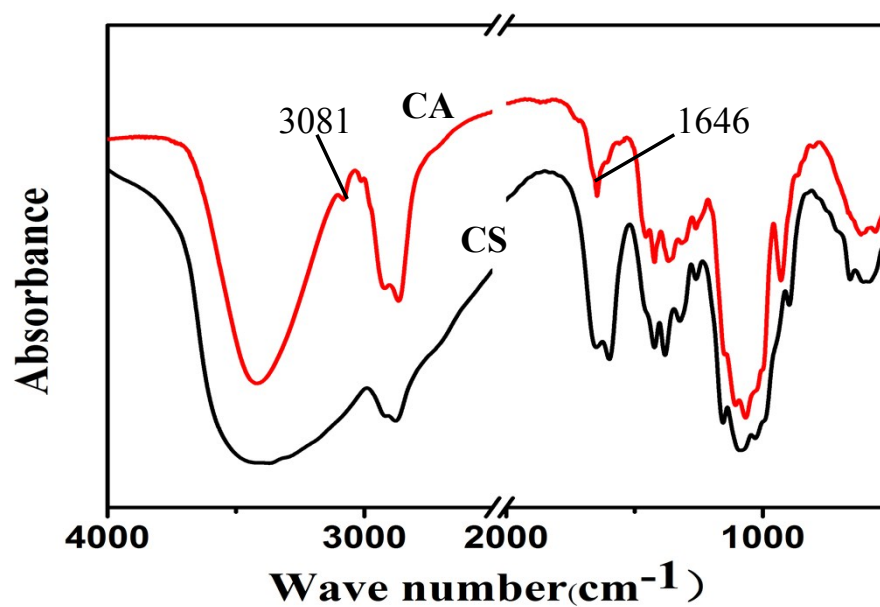

Fig. S1. FT-IR spectra of CS powder and CA macro-crosslinker.

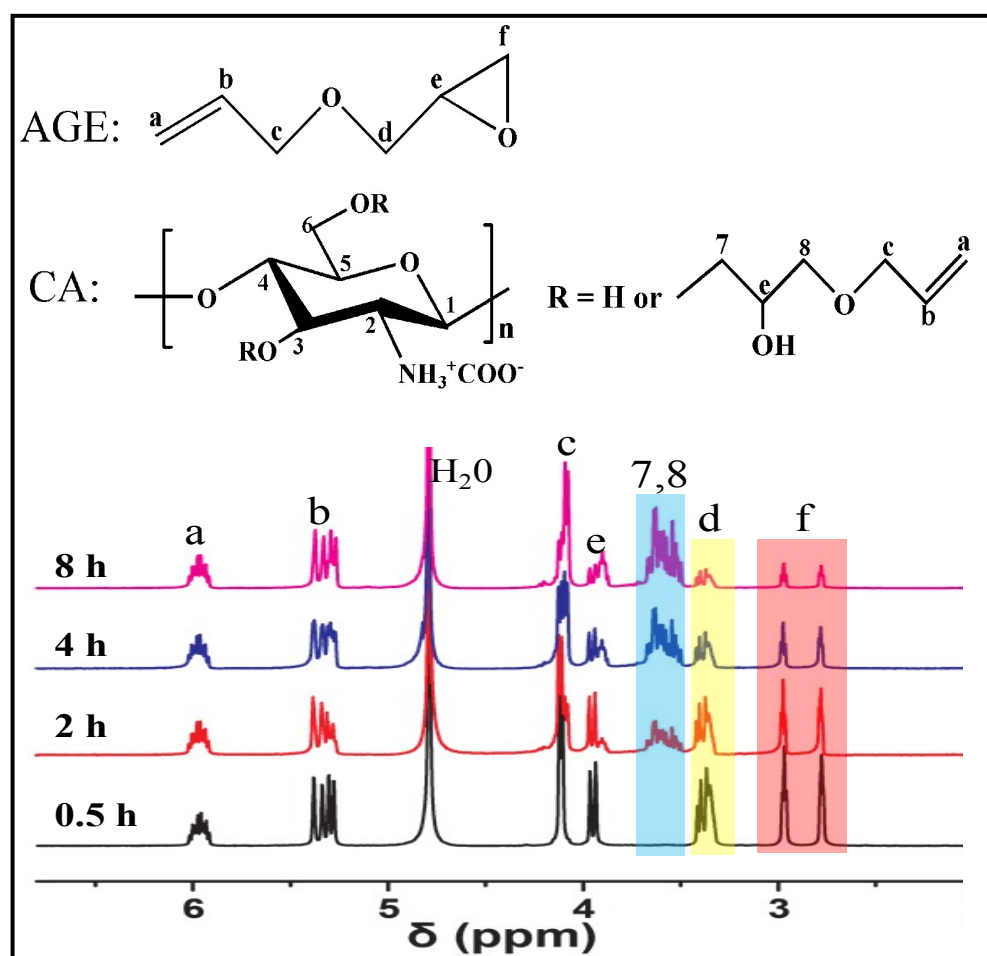

Fig. S2. <sup>1</sup>H NMR spectra for CA macro-crosslinker reaction solution during different reaction

stages. CS and AGE were dissolved in  $\text{CD}_3\text{COOD}/\text{D}_2\text{O}$  and then reacted, we took samples at different reaction time and cooled them rapidly to stop the reaction. Because the addition of AGE is much larger than that of CS, the peak of H on CS is not obvious, and it is covered by AGE.

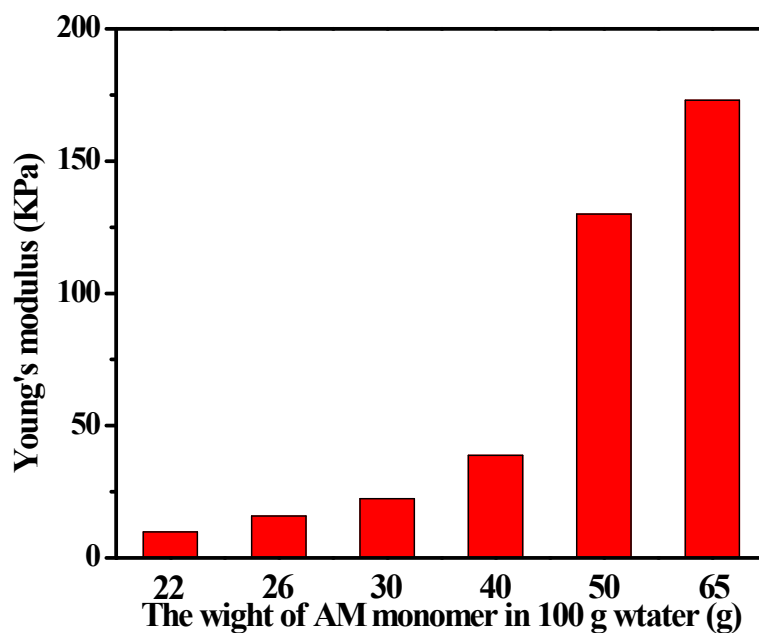

Fig. S3. Young's modulus of  $\text{MC}_{2.0-y}$  hydrogels.

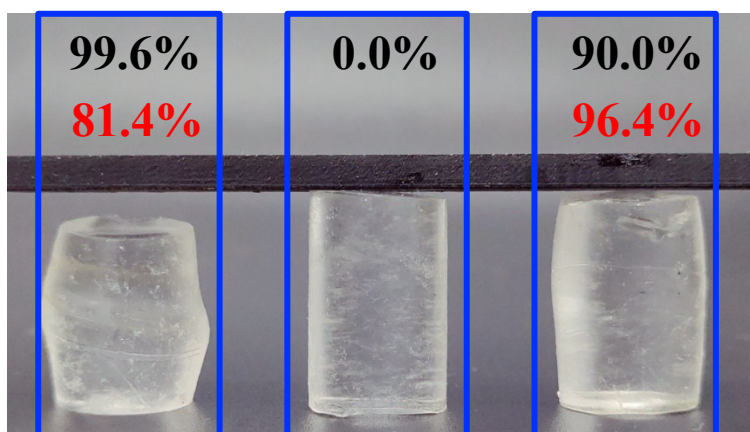

Fig. S4. Photos of the MC hydrogel before and after compression, respectively. The black fonts represent the compressive strain, and the red fonts represent the strain recovery ratio.

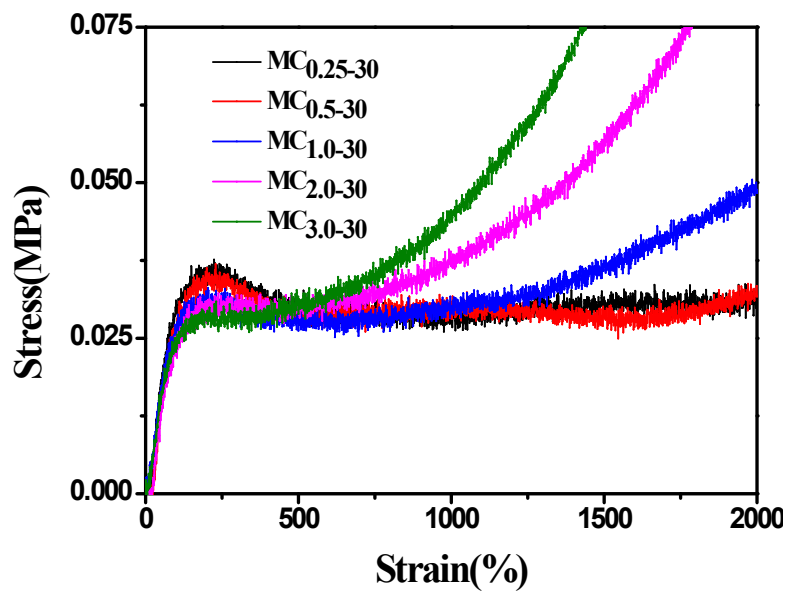

Fig. S5. Locally enlarged stress–strain curves of  $MC_{x-30}$  hydrogels.

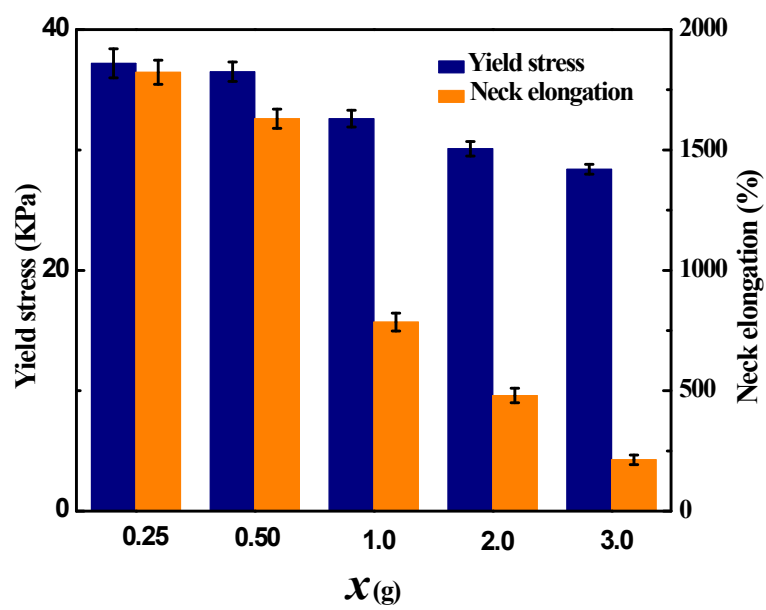

Fig. S6. Yield stress and neck elongation of  $MC_{x-30}$  hydrogels.

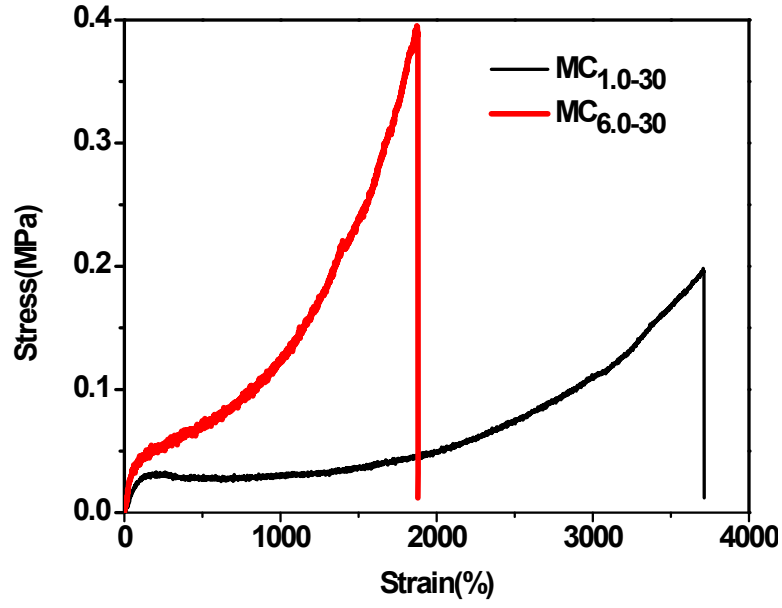

Fig. S7. Typical stress-strain curves of MC<sub>1.0-30</sub> and MC<sub>6.0-30</sub> hydrogels.

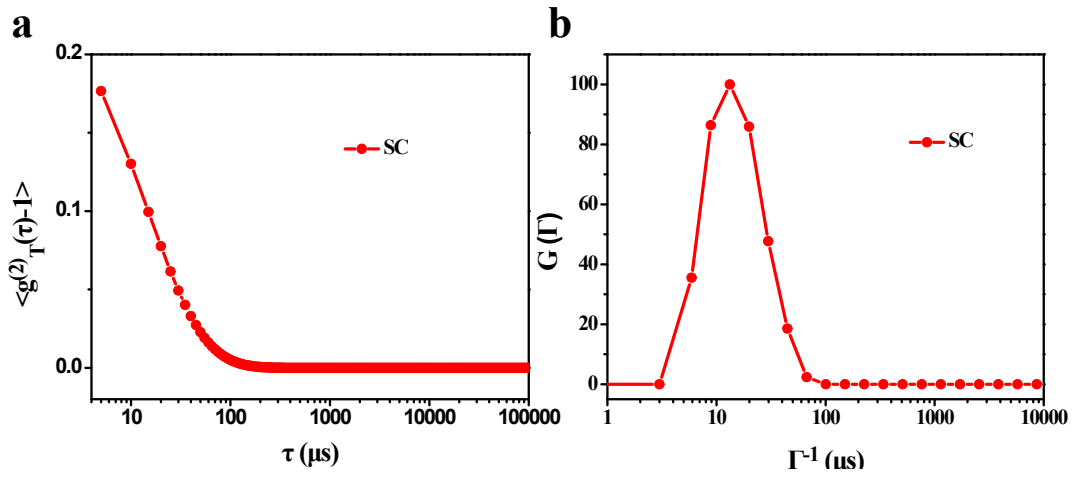

Fig. S8. (a) Ensemble-averaged correlation function  $\langle g_T^{(2)}(\tau)-1 \rangle$  and (b) relaxation-time distribution function  $G(\Gamma)$  for the SC hydrogel.
